# Supplementary material for: Efficient transparent blue-emitted perovskite light-emitting diodes based on multilayer transparent top electrodes
Source: Royal Society of Chemistry journal article supplement (doi:10.1039/d4tc00934g), 2024-01-01
Supplement: d4tc00934g1.pdf [file d4tc00934g1.pdf]

## Supporting information

### Efficient Transparent Blue-Emitted Perovskite Light-Emitting Diodes Based on Multilayer Transparent Top Electrodes

Zhenghao He<sup>1,2</sup>, Zhiqiang Bao<sup>1,2</sup>, Xiaoyang Guo<sup>1\*</sup>, Ying Lv<sup>1</sup>, Tienan Wang<sup>1</sup>, Yuejia Ma<sup>1</sup>,

Xingyuan Liu<sup>1\*</sup>

1. State Key Laboratory of luminescence and Applications, Changchun Institute of Optics, Fine

Mechanics and Physics, Chinese Academy of Sciences, Changchun 130033, P. R. China

2. University of Chinese Academy of Sciences, Beijing 100049, P. R. China

**Email:** guoxy@ciomp.ac.cn; liuxy@ciomp.ac.cn

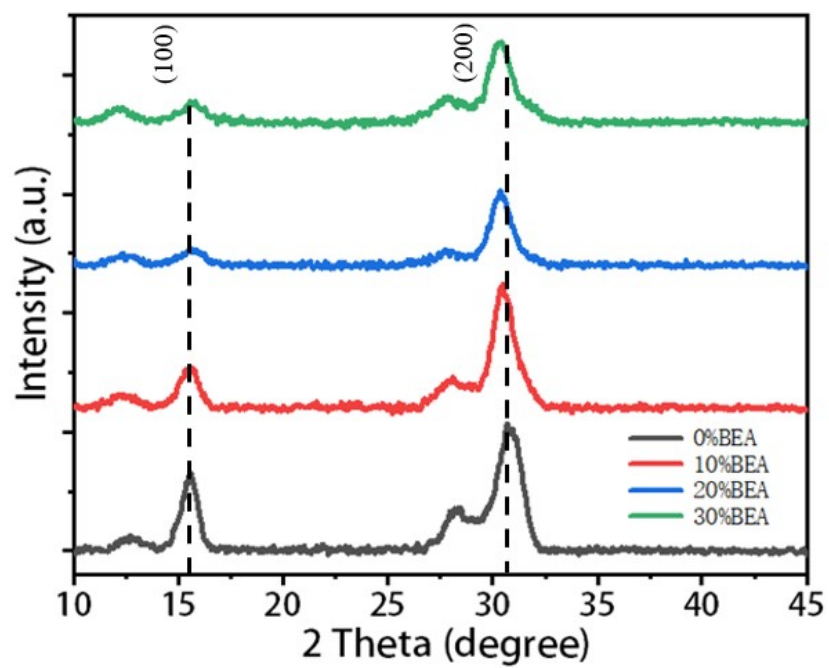

**Figure S1.** XRD patterns of perovskite films with BEABr concentration of 0%, 10%, 20%, and 30%, respectively.

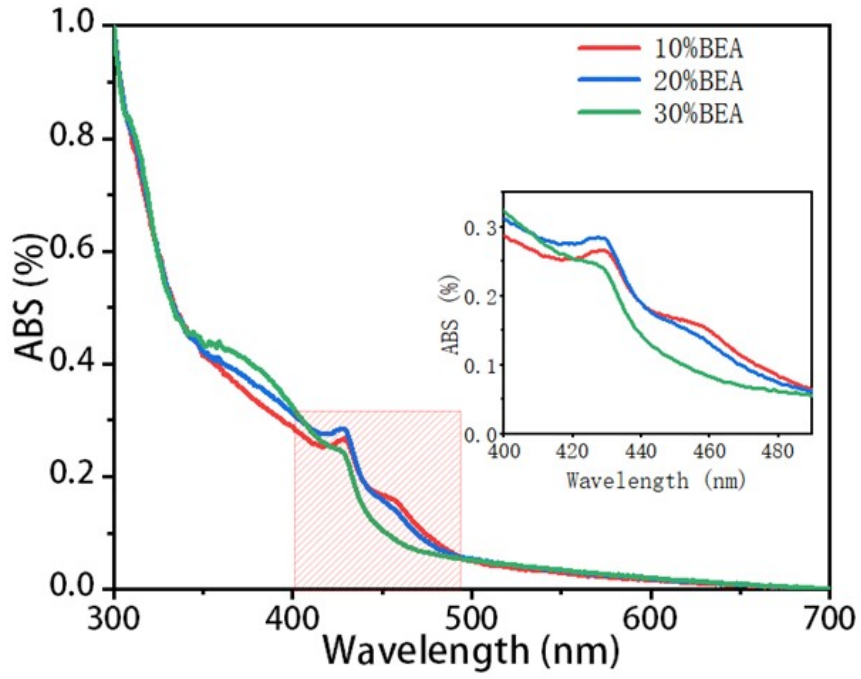

**Figure S2.** Absorption curves of perovskite films with BEABr concentration of 10%, 20%, and 30%, respectively.

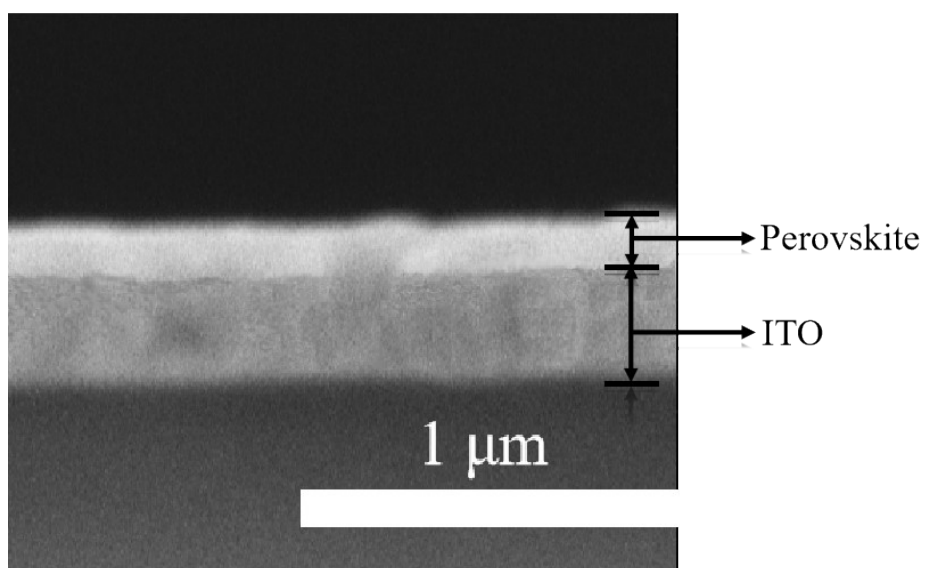

**Figure S3.** Cross-sectional SEM images of the perovskite film.

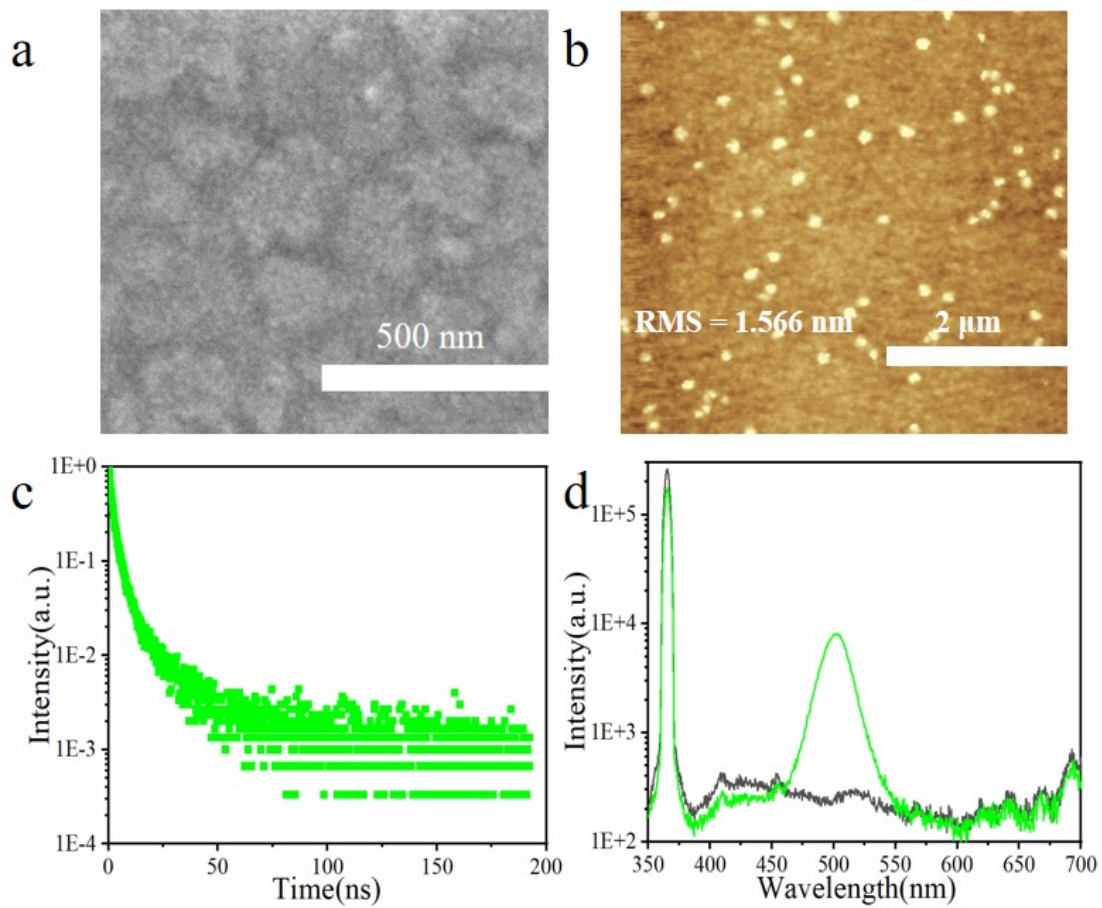

**Figure S4.** (a) SEM, (b) AFM, (c) Fluorescence lifetime and (d) PLQY of perovskite films without BEABr, respectively.

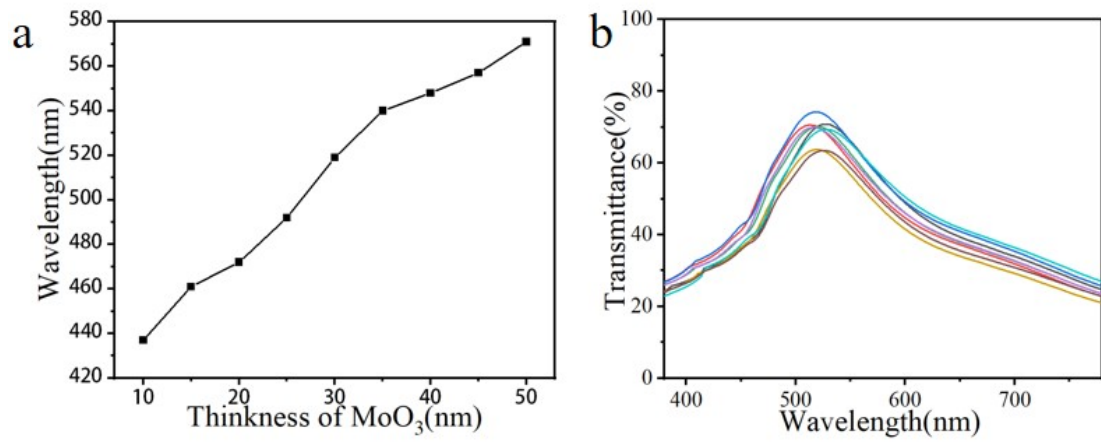

**Figure S5.** (a) The changes of the maximum transmittance wavelength of TPeLEDs with varying MoO<sub>3</sub> thickness. (b) The transmittance of TPeLED devices with MoO<sub>3</sub> thickness of 30 nm.

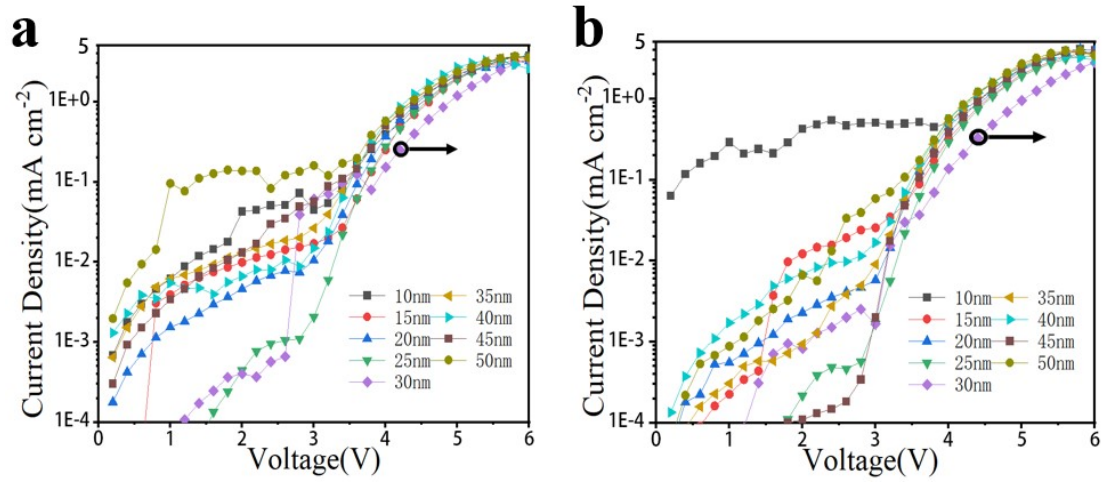

**Figure S6.** Current density varied with voltage of the TPeLEDs tested from (a) ITO side and (b) MoO<sub>3</sub> side with different MoO<sub>3</sub> thicknesses.

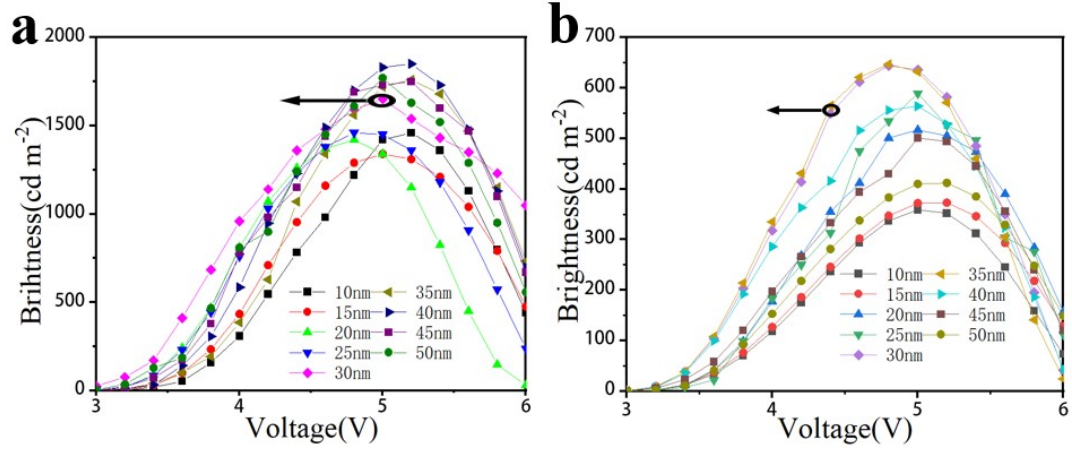

**Figure S7.** Brightness of the TPeLEDs tested from (a) ITO side and (b) MoO<sub>3</sub> side with different MoO<sub>3</sub> thicknesses.



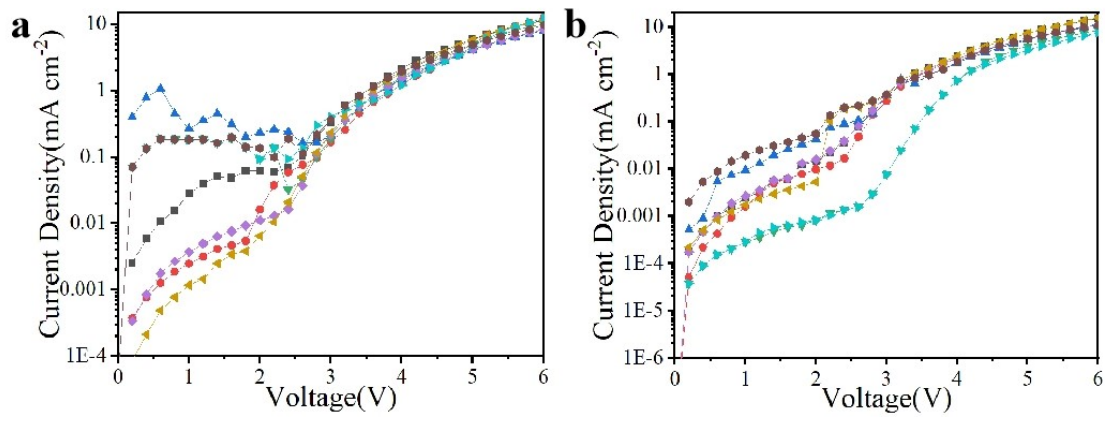

**Figure S8.** Current Density of devices with a MoO<sub>3</sub> thickness of (a) 30 nm, and (b) 0 nm. Device structure: ITO/PEDOT:PSS/TPBi/Bphen/Cs<sub>2</sub>CO<sub>3</sub>/Ag/MoO<sub>3</sub>.

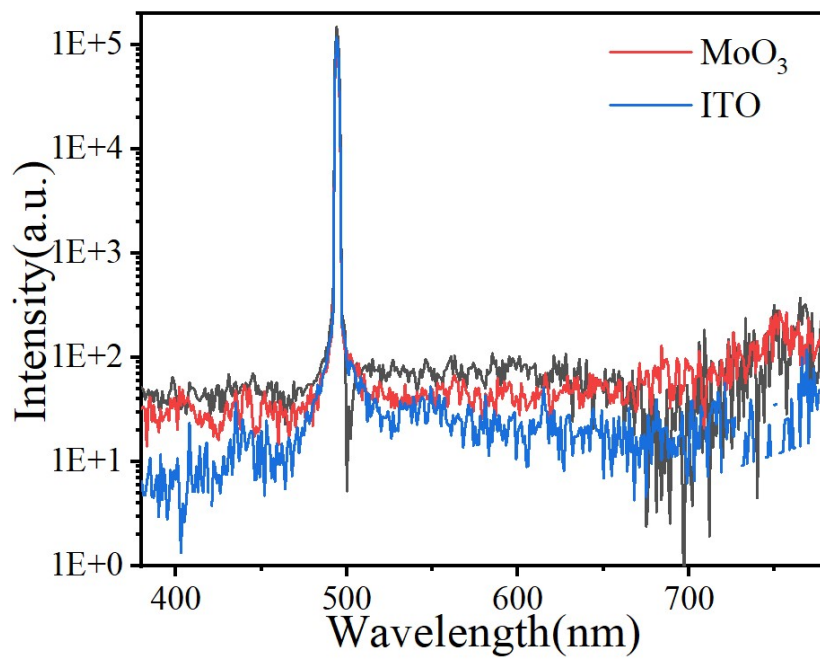

**Figure S9.** PLQY of TPeLED device on MoO<sub>3</sub> side and ITO side.
